# Supplementary material for: Identification of blood biomarkers in glioblastoma by SWATH mass spectrometry and quantitative targeted absolute proteomics
Source: PubMed Central journal article supplement (PMC5841790; doi:10.1371/journal.pone.0193799), 2018-03-07
Supplement: pone.0193799.s005.pdf [file pone.0193799.s005.pdf]

**S1 Table. Peptide probes and PRM transitions for QTAP analysis.**

| Uni-Prot<br>Accession No. | Protein                               | Gene     | Probe Sequence   | PRM transition |                       |         |         |         |
|---------------------------|---------------------------------------|----------|------------------|----------------|-----------------------|---------|---------|---------|
|                           |                                       |          |                  | Q1<br>(m/z)    | TOF range (m/z±0.025) |         |         |         |
|                           |                                       |          |                  |                | 1                     | 2       | 3       | 4       |
| P01011                    | Alpha-1-<br>antichymotrypsin          | SERPINA3 | NLAVSQVVHK       | 365.5          | 697.399               | 200.140 | 284.172 | 383.240 |
|                           |                                       |          | NLAVSQVVHK*      | 368.2          | 705.413               | 200.140 | 292.186 | 391.254 |
| P06727                    | Apolipoprotein A-IV                   | APOA4    | LEPYADQLR        | 552.8          | 862.442               | 431.725 | 602.326 | 765.389 |
|                           |                                       |          | LEPYADQLR*       | 557.8          | 872.450               | 436.729 | 612.334 | 775.397 |
| P04114                    | Apolipoprotein B-100                  | APOB     | LATALSLSNK       | 509.3          | 661.388               | 548.304 | 185.129 | 286.176 |
|                           |                                       |          | LATALSLSNK*      | 513.3          | 669.402               | 556.318 | 185.129 | 286.176 |
| P02748                    | Complement component<br>C9            | C9       | VVEESELAR        | 516.3          | 704.357               | 171.149 | 575.315 | 199.144 |
|                           |                                       |          | VVEESELAR*       | 521.3          | 714.366               | 171.149 | 585.323 | 199.144 |
| P02741                    | C-reactive protein                    | CRP      | ESDTSYVSLK       | 564.8          | 696.393               | 347.229 | 609.361 | 446.297 |
|                           |                                       |          | ESDTSYVSLK*      | 568.8          | 704.407               | 355.243 | 617.375 | 454.312 |
| P06396                    | Gelsolin                              | GSN      | HVVPNEVVVQR      | 425.9          | 501.314               | 676.342 | 402.246 | 336.203 |
|                           |                                       |          | HVVPNEVVVQR*     | 429.2          | 511.323               | 676.342 | 412.254 | 336.203 |
| P01876                    | Ig alpha-1 chain C<br>region          | IGHA1    | DASGVTFTWTPSSGK  | 770.9          | 475.251               | 576.299 | 430.193 | 331.125 |
|                           |                                       |          | DASGVTFTWTPSSGK* | 774.9          | 483.265               | 584.313 | 430.193 | 331.125 |
| P02750                    | Leucine-rich alpha-2-<br>glycoprotein | LRG1     | ALGHLDLSGNR      | 384.9          | 433.215               | 661.326 | 346.183 | 607.320 |
|                           |                                       |          | ALGHLDLSGNR*     | 388.2          | 443.224               | 671.335 | 356.192 | 607.320 |

Bold letters with asterisks indicate amino acid residues labeled with stable isotope (<sup>13</sup>C and <sup>15</sup>N). Four parallel reaction-monitoring (PRM) transitions (Q1/TOF-1, Q1/TOF-2, Q1/TOF-3, and Q1/TOF-4), each of which consisted of the m/z value of precursor ion (Q1) and the m/z value (TOF1-4) of the product ion with a range of m/z±0.025, were set for each peptide. Collision energy (CE) for each targeted peptide was calculated from Eq. 1. In quantitative targeted absolute proteomics

(QTAP) analysis, CE of stable isotope-labeled peptides was calculated from Eq. 1 using precursor ion m/z of paired standard peptides. Collision energy spread was set at 5 eV.

$$CE = 0.044 \times (\text{precursor ion m/z}) + 4 \quad (\text{Eq. 1})$$

The target peptide to be quantified were selected by the m/z value of Q1 using the MRM-High Resolution mode of Triple TOF 5600 (SCIEX, Framingham, Massachusetts). An auto analysis system established in our laboratory was used to extract the data set of each target peptide with the four transitions in the MRM-High Resolution analysis and to determine the quantitative value of the target peptide.
