# Supplementary material for: Identification of blood biomarkers in glioblastoma by SWATH mass spectrometry and quantitative targeted absolute proteomics
Source: PubMed Central journal article supplement (PMC5841790; doi:10.1371/journal.pone.0193799), 2018-03-07
Supplement: pone.0193799.s006.pdf [file pone.0193799.s006.pdf]

**S2 Table. Plasma concentrations of up-regulated biomarker candidates in the GBM patients and healthy controls.**

| Subject | Plasma concentration (fmol/ $\mu$ L plasma, mean $\pm$ SEM) |               |                 |                |               |
|---------|-------------------------------------------------------------|---------------|-----------------|----------------|---------------|
|         | LRG1                                                        | C9            | CRP             | SERPINA3       | APOB          |
| P1      | 408 $\pm$ 28                                                | 619 $\pm$ 35  | 283 $\pm$ 21    | 4256 $\pm$ 113 | 1199 $\pm$ 29 |
| P2      | 272 $\pm$ 9                                                 | 378 $\pm$ 25  | 21.4 $\pm$ 5.4  | 3058 $\pm$ 137 | 1146 $\pm$ 53 |
| P3      | 362 $\pm$ 12                                                | 785 $\pm$ 41  | 154 $\pm$ 8     | 10086 $\pm$ 49 | 1184 $\pm$ 17 |
| P4      | 765 $\pm$ 39                                                | 1267 $\pm$ 37 | 1193 $\pm$ 24   | 9017 $\pm$ 26  | 724 $\pm$ 19  |
| P5      | 337 $\pm$ 23                                                | 368 $\pm$ 8   | 13.7 $\pm$ 1.8  | 2775 $\pm$ 99  | 809 $\pm$ 32  |
| P6      | 644 $\pm$ 27                                                | 741 $\pm$ 53  | 393 $\pm$ 21    | 6395 $\pm$ 24  | 901 $\pm$ 37  |
| P7      | 651 $\pm$ 10                                                | 724 $\pm$ 38  | 72.0 $\pm$ 6.7  | 4147 $\pm$ 117 | 1693 $\pm$ 42 |
| P8      | 242 $\pm$ 8                                                 | 454 $\pm$ 23  | 6.82 *          | 2692 $\pm$ 67  | 1078 $\pm$ 27 |
| P9      | 285 $\pm$ 17                                                | 318 $\pm$ 17  | 51.5 $\pm$ 3.0  | 2812 $\pm$ 55  | 975 $\pm$ 36  |
| P10     | 343 $\pm$ 12                                                | 663 $\pm$ 33  | 100 $\pm$ 10    | 3693 $\pm$ 98  | 1011 $\pm$ 33 |
| P11     | 280 $\pm$ 10                                                | 338 $\pm$ 23  | ULQ (<15.6)     | 3261 $\pm$ 78  | 790 $\pm$ 13  |
| P12     | 391 $\pm$ 15                                                | 598 $\pm$ 40  | 16.8 $\pm$ 3.9  | 3965 $\pm$ 191 | 1212 $\pm$ 24 |
| P13     | 346 $\pm$ 17                                                | 430 $\pm$ 35  | 32.5 $\pm$ 5.6  | 3305 $\pm$ 81  | 1448 $\pm$ 40 |
| P14     | 154 $\pm$ 13                                                | 293 $\pm$ 12  | 41.5 $\pm$ 5.5  | 2264 $\pm$ 64  | 1256 $\pm$ 53 |
| C1      | 207 $\pm$ 14                                                | 274 $\pm$ 21  | 6.25 $\pm$ 2.29 | 3370 $\pm$ 173 | 957 $\pm$ 8   |
| C2      | 194 $\pm$ 7                                                 | 325 $\pm$ 23  | 9.86 *          | 2837 $\pm$ 107 | 972 $\pm$ 28  |
| C3      | 189 $\pm$ 4                                                 | 279 $\pm$ 14  | ULQ (<14.8)     | 2529 $\pm$ 60  | 954 $\pm$ 38  |
| C4      | 198 $\pm$ 17                                                | 298 $\pm$ 22  | 11.6 $\pm$ 3.3  | 2947 $\pm$ 54  | 1058 $\pm$ 24 |
| C5      | 191 $\pm$ 6                                                 | 331 $\pm$ 13  | 9.14 $\pm$ 5.25 | 2995 $\pm$ 87  | 852 $\pm$ 39  |
| C6      | 338 $\pm$ 27                                                | 304 $\pm$ 12  | 48.3 $\pm$ 4.3  | 3136 $\pm$ 99  | 1258 $\pm$ 45 |
| C7      | 263 $\pm$ 7                                                 | 311 $\pm$ 14  | ULQ (<13.0)     | 2806 $\pm$ 52  | 1279 $\pm$ 44 |
| C8      | 271 $\pm$ 16                                                | 407 $\pm$ 33  | 30.7 $\pm$ 6.0  | 3280 $\pm$ 100 | 976 $\pm$ 10  |
| C9      | 169 $\pm$ 7                                                 | 262 $\pm$ 9   | ULQ (<13.2)     | 2588 $\pm$ 90  | 849 $\pm$ 13  |
| C10     | 179 $\pm$ 9                                                 | 292 $\pm$ 23  | ULQ (<14.5)     | 3174 $\pm$ 129 | 1002 $\pm$ 18 |
| C11     | 217 $\pm$ 13                                                | 259 $\pm$ 19  | ULQ (<17.0)     | 2816 $\pm$ 81  | 844 $\pm$ 20  |
| C12     | 239 $\pm$ 9                                                 | 291 $\pm$ 13  | 10.5 $\pm$ 4.8  | 3426 $\pm$ 22  | 1053 $\pm$ 28 |
| C13     | 230 $\pm$ 12                                                | 248 $\pm$ 18  | ULQ (<13.1)     | 2489 $\pm$ 71  | 1053 $\pm$ 31 |
| C14     | 280 $\pm$ 16                                                | 498 $\pm$ 15  | 34.0 $\pm$ 2.4  | 3270 $\pm$ 108 | 885 $\pm$ 22  |
| C15     | 233 $\pm$ 7                                                 | 425 $\pm$ 31  | 23.1 $\pm$ 6.1  | 3270 $\pm$ 110 | 1221 $\pm$ 24 |

Each value represents the mean $\pm$ SEM (n=3-4 transitions) of the quantitative values determined by using 3 or 4 parallel reaction-monitoring transitions in one analysis. Asterisk represents the mean of the quantitative values obtained from two transitions. GBM, glioblastoma; SEM, standard error of mean
