# Supplementary material for: Identification of blood biomarkers in glioblastoma by SWATH mass spectrometry and quantitative targeted absolute proteomics
Source: PubMed Central journal article supplement (PMC5841790; doi:10.1371/journal.pone.0193799), 2018-03-07
Supplement: pone.0193799.s007.pdf [file pone.0193799.s007.pdf]

**S3 Table. Plasma concentrations of down-regulated biomarker candidates in the GBM patients and healthy controls.**

| Subject | Plasma concentration (fmol/ $\mu$ L plasma, mean $\pm$ SEM) |                  |                  |
|---------|-------------------------------------------------------------|------------------|------------------|
|         | GSN                                                         | IGHA1            | APOA4            |
| P1      | 353 $\pm$ 9                                                 | 11628 $\pm$ 686  | 2896 $\pm$ 191   |
| P2      | 590 $\pm$ 14                                                | 15535 $\pm$ 1168 | 8448 $\pm$ 670   |
| P3      | 178 $\pm$ 6                                                 | 7183 $\pm$ 589   | 4083 $\pm$ 236   |
| P4      | 521 $\pm$ 9                                                 | 12338 $\pm$ 716  | 5712 $\pm$ 190   |
| P5      | 386 $\pm$ 14                                                | 17675 $\pm$ 1137 | 5433 $\pm$ 461   |
| P6      | 333 $\pm$ 4                                                 | 10974 $\pm$ 390  | 2220 $\pm$ 162   |
| P7      | 319 $\pm$ 10                                                | 4304 $\pm$ 240   | 9429 $\pm$ 681   |
| P8      | 489 $\pm$ 19                                                | 11040 $\pm$ 87   | 9300 $\pm$ 458   |
| P9      | 626 $\pm$ 10                                                | 15700 $\pm$ 784  | 15347 $\pm$ 1024 |
| P10     | 549 $\pm$ 15                                                | 11804 $\pm$ 370  | 7827 $\pm$ 573   |
| P11     | 560 $\pm$ 22                                                | 20119 $\pm$ 1297 | 12921 $\pm$ 847  |
| P12     | 558 $\pm$ 14                                                | 10880 $\pm$ 627  | 9341 $\pm$ 587   |
| P13     | 667 $\pm$ 22                                                | 24706 $\pm$ 2041 | 13474 $\pm$ 562  |
| P14     | 473 $\pm$ 7                                                 | 15109 $\pm$ 1161 | 8930 $\pm$ 403   |
| C1      | 907 $\pm$ 11                                                | 17229 $\pm$ 1442 | 11985 $\pm$ 447  |
| C2      | 783 $\pm$ 13                                                | 12869 $\pm$ 788  | 13539 $\pm$ 452  |
| C3      | 884 $\pm$ 21                                                | 32685 $\pm$ 2247 | 15790 $\pm$ 1046 |
| C4      | 754 $\pm$ 9                                                 | 18577 $\pm$ 210  | 10268 $\pm$ 786  |
| C5      | 922 $\pm$ 13                                                | 16673 $\pm$ 1172 | 16213 $\pm$ 1021 |
| C6      | 901 $\pm$ 24                                                | 16528 $\pm$ 1342 | 15145 $\pm$ 733  |
| C7      | 820 $\pm$ 7                                                 | 22095 $\pm$ 1134 | 14878 $\pm$ 635  |
| C8      | 694 $\pm$ 29                                                | 29756 $\pm$ 1877 | 12058 $\pm$ 934  |
| C9      | 678 $\pm$ 23                                                | 20864 $\pm$ 1385 | 15432 $\pm$ 1219 |
| C10     | 818 $\pm$ 21                                                | 25649 $\pm$ 2389 | 11224 $\pm$ 850  |
| C11     | 562 $\pm$ 15                                                | 25856 $\pm$ 1327 | 10642 $\pm$ 662  |
| C12     | 736 $\pm$ 20                                                | 18784 $\pm$ 711  | 11444 $\pm$ 351  |
| C13     | 757 $\pm$ 14                                                | 26019 $\pm$ 1174 | 15990 $\pm$ 992  |
| C14     | 826 $\pm$ 17                                                | 20537 $\pm$ 1245 | 18281 $\pm$ 914  |
| C15     | 720 $\pm$ 16                                                | 24089 $\pm$ 1417 | 9198 $\pm$ 562   |

Each value represents the mean $\pm$ SEM (n=3-4 transitions) of the quantitative values determined by using 3 or 4 parallel reaction-monitoring transitions in one analysis. GBM, glioblastoma; SEM, standard error of mean
